# Supplementary material
Source: PubMed Central journal article supplement (PMC4790713)
Supplement: vana005953.ww1_default.pdf [file vana005953.ww1_default.pdf]

**Appendix Table 1: Specificity, predictive value and likelihood ratio of gut feeling for the diagnosis of serious infection**

|                                               | <b>Specificity<br/>(%, 95%CI)</b> | <b>Positive Predictive Value<br/>(%, 95%CI)</b> | <b>Likelihood Ratio<br/>(LR+, 95% CI)</b> |
|-----------------------------------------------|-----------------------------------|-------------------------------------------------|-------------------------------------------|
| All children<br>(n=3890)                      | 97.2<br>(96.7-97.7)               | 10.8<br>(5.9-17.8)                              | 22.4<br>(15.2-32.9)                       |
| <b>By age</b>                                 |                                   |                                                 |                                           |
| Children ≤3 years<br>(n=1616)                 | 96.8<br>(95.8-97.6)               | 16.4<br>(8.15-28.1)                             | 19.6<br>(12.3-31.2)                       |
| Children >3 years<br>(n=2274)                 | 97.5<br>(96.8-98.1)               | 5.08<br>(1.1-14.1)                              | 24.3<br>(11.4-52.0)                       |
| <b>By serious infection</b>                   |                                   |                                                 |                                           |
| Pneumonia<br>(n=3881)                         | 97.2<br>(96.7-97.7)               | 7.76<br>(3.6-14.2)                              | 27.1<br>(18.6-39.5)                       |
| All other serious infections<br>(n=3878)      | 97.2<br>(96.7-97.7)               | 3.6<br>(0.99-9.0)                               | 16.1<br>(7.6-34.2)                        |
| <b>By body temperature</b>                    |                                   |                                                 |                                           |
| Children with temperature ≥38.5°C<br>(n=1939) | 96.7<br>(95.8-97.4)               | 12.3<br>(5.8-22.1)                              | 15.9<br>(9.6-26.4)                        |
| Children with temperature <38.5°C<br>(n=1951) | 97.8<br>(97.0-98.4)               | 8.51<br>(2.4-20.4)                              | 45.3<br>(33.7-60.9)                       |
| <b>By clinician experience</b>                |                                   |                                                 |                                           |
| <10 years<br>(n=446)                          | 96.4<br>(94.2-97.9)               | 11.1<br>(1.4-34.7)                              | 18.5<br>(7.3-47.0)                        |
| ≥10 years<br>(n=3444)                         | 97.3<br>(96.7-97.7)               | 10.8<br>(5.5-18.5)                              | 23.0<br>(15.1-35.0)                       |

**Appendix Table 2: Clinical features included in the analyses**

| <b>General features</b>                           | <b>Respiratory features</b>       | <b>Gastrointestinal features</b> | <b>Classic textbook symptoms/red flags</b> |
|---------------------------------------------------|-----------------------------------|----------------------------------|--------------------------------------------|
| Age                                               | Signs of URTI                     | Vomiting                         | Urinary symptoms                           |
| Duration of illness                               | Cough                             | Decreased eating and drinking    | Convulsions                                |
| Chronic condition                                 | Changed breathing                 | Tummy ache                       | <i>Meningeal irritation</i>                |
| Temperature                                       | <i>Tachypnoea</i>                 | Weight loss                      | <i>Petechiae</i>                           |
| Irritability                                      | <i>Dyspnoea</i>                   | Diarrhoea                        | <i>Rash</i>                                |
| Drowsiness                                        | <i>Crackles</i>                   | <i>Signs of dehydration</i>      | <i>Decreased peripheral circulation</i>    |
| Inconsolable                                      | <i>Decreased breathing sounds</i> |                                  | <i>Decreased consciousness</i>             |
| Changed crying                                    | <i>Cyanosis</i>                   |                                  |                                            |
| Moaning                                           |                                   |                                  |                                            |
| Does not laugh                                    |                                   |                                  |                                            |
| Headache                                          |                                   |                                  |                                            |
| Parental concern because the illness is different |                                   |                                  |                                            |
| Physician's experience                            |                                   |                                  |                                            |

Clinical features elicited from clinical examination and included only in the second model are shown in italics

**Appendix Table 3: Univariate analyses of clinical feature and gut feeling in children for whom the clinical impression was that of a non-serious illness**

|                                  | Gut feeling present<br>N=120<br>% (except where<br>stated) | Gut feeling absent<br>N=3770<br>%(except where stated) | Chi2, p-<br>value |
|----------------------------------|------------------------------------------------------------|--------------------------------------------------------|-------------------|
| <b>General</b>                   |                                                            |                                                        |                   |
| Mean age (years)                 | 5.10                                                       | 5.07                                                   | 0.518             |
| Mean duration of illness (hours) | 38.42                                                      | 44.41                                                  | 0.077             |
| Chronic condition                | 19.05                                                      | 6.83                                                   | 0.002             |
| Mean temperature °C              | 38.22                                                      | 37.95                                                  | 0.049             |
| Irritable                        | 17.78                                                      | 7.64                                                   | 0.012             |
| Drowsy                           | 18.18                                                      | 3.27                                                   | 0.000             |
| Inconsolable                     | 4.55                                                       | 2.12                                                   | 0.270             |
| Changed crying                   | 20.45                                                      | 1.94                                                   | 0.000             |
| Moaning                          | 4.55                                                       | 0.82                                                   | 0.008             |
| Does not laugh                   | 34.09                                                      | 6.31                                                   | 0.000             |
| Headache                         | 17.39                                                      | 18.22                                                  | 0.885             |
| Parental concern                 | 32.61                                                      | 1.56                                                   | 0.000             |
| Clinician experience (years)     | 17.25                                                      | 20.13                                                  | 0.121             |
| <b>Respiratory features</b>      |                                                            |                                                        |                   |
| Signs of URTI                    | 54.35                                                      | 69.06                                                  | 0.032             |
| Cough                            | 39.13                                                      | 48.08                                                  | 0.227             |
| Changed breathing                | 21.74                                                      | 7.13                                                   | 0.000             |
| Tachypnoea                       | 15.22                                                      | 1.75                                                   | 0.000             |
| Dyspnoea                         | 17.39                                                      | 3.18                                                   | 0.000             |
| Crackles                         | 17.39                                                      | 4.05                                                   | 0.000             |
| Decreased breathing sounds       | 8.70                                                       | 1.78                                                   | 0.001             |
| Cyanosis                         | 2.17                                                       | 0.03                                                   | 0.000             |
| <b>Gastrointestinal features</b> |                                                            |                                                        |                   |

|                                  |       |       |       |
|----------------------------------|-------|-------|-------|
| Vomiting                         | 17.39 | 17.89 | 0.931 |
| Diarrhoea                        | 8.70  | 15.75 | 0.191 |
| Decreased eating and drinking    | 30.43 | 20.45 | 0.096 |
| Tummy ache                       | 26.09 | 18.35 | 0.179 |
| Weight loss                      | 8.70  | 1.42  | 0.000 |
| Signs of dehydration             | 2.17  | 0.24  | 0.012 |
| <b>Classic textbook signs</b>    |       |       |       |
| Meningeal irritation             | 2.17  | 0.03  | 0.000 |
| Petechiae                        | 4.35  | 0.09  | 0.000 |
| Rash                             | 4.35  | 3.21  | 0.663 |
| Decreased peripheral circulation | 2.17  | 0.03  | 0.000 |
| Seizures                         | 4.35  | 0.09  | 0.000 |
| Urinary symptoms                 | 8.70  | 1.49  | 0.000 |
| Decreased consciousness          | 2.27  | 0.12  | 0.000 |
